# Supplementary material
Source: PubMed Central journal article supplement (PMC4285541)
Supplement: supp_fj.14-255901_Supplemental_Table1.pdf [file supp_fj.14-255901_Supplemental_Table1.pdf]

## SUPPLEMENTAL TABLES

**Supplemental Table 1. Carnitine and acylcarnitine levels (nmol/25 cm<sup>2</sup> flask) in the media**

|                                      | mean     |           |             | sem     |           |             |
|--------------------------------------|----------|-----------|-------------|---------|-----------|-------------|
|                                      | basal    | palmitate | palmitate + | basal   | palmitate | palmitate + |
| total_carnitine                      | 2878.063 | 2859.769  | 2826.297    | 144.122 | 168.164   | 112.299     |
| free_carnitine                       | 2930.799 | 2871.409  | 2854.801    | 126.889 | 151.128   | 102.556     |
| butyrobetaine                        | 1.939    | 1.312     | 1.448       | 0.575   | 0.203     | 0.073       |
| acetylcarnitine                      | 27.053   | 34.381    | 24.627      | 9.308   | 12.013    | 7.762       |
| propionylcarnitine                   | 0.609    | 0.661     | 0.505       | 0.056   | 0.091     | 0.056       |
| butyrylcarnitine                     | 0.156    | 0.545     | 0.402       | 0.042   | 0.113     | 0.079       |
| isobutyrylcarnitine                  | 0.169    | 0.187     | 0.144       | 0.016   | 0.027     | 0.009       |
| R-3-hydroxy-butyrylcarnitine         | 0.004    | 0.010     | 0.005       | 0.000   | 0.003     | 0.001       |
| S-3-hydroxy-butyrylcarnitine         | 0.039    | 0.062     | 0.038       | 0.011   | 0.016     | 0.009       |
| valerylcarnitine                     | 0.008    | 0.007     | 0.007       | 0.002   | 0.001     | 0.001       |
| isovalerylcarnitine                  | 0.053    | 0.056     | 0.035       | 0.005   | 0.009     | 0.001       |
| 3-hydroxy-isovalerylcarnitine        | 0.014    | 0.012     | 0.011       | 0.003   | 0.003     | 0.002       |
| 2-methyl-butyrylcarnitine            | 0.215    | 0.220     | 0.167       | 0.010   | 0.023     | 0.004       |
| tigloylcarnitine                     | 0.003    | 0.002     | 0.002       | 0.000   | 0.000     | 0.000       |
| 3-methyl-crotonylcarnitine           | 0.001    | 0.002     | 0.001       | 0.001   | 0.000     | 0.000       |
| hexanoylcarnitine                    | 0.066    | 0.220     | 0.160       | 0.026   | 0.054     | 0.029       |
| R-3-hydroxy-hexanoylcarnitine        | 0.000    | 0.001     | 0.001       | 0.000   | 0.000     | 0.000       |
| S-3-hydroxy-hexanoylcarnitine        | 0.001    | 0.001     | 0.002       | 0.000   | 0.000     | 0.000       |
| phenylacetylcarnitine                | 0.001    | 0.001     | 0.001       | 0.000   | 0.000     | 0.000       |
| phenylpropionylcarnitine             | 0.000    | 0.001     | 0.000       | 0.000   | 0.000     | 0.000       |
| 4-phenyl-butyrylcarnitine            | 0.001    | 0.001     | 0.001       | 0.000   | 0.000     | 0.000       |
| benzoylcarnitine                     | 0.003    | 0.002     | 0.001       | 0.000   | 0.001     | 0.001       |
| 4-methyl-hexanoylcarnitine           | 0.001    | 0.001     | 0.001       | 0.000   | 0.000     | 0.000       |
| octanoylcarnitine                    | 0.035    | 0.169     | 0.124       | 0.014   | 0.031     | 0.014       |
| R-3-hydroxy-octanoylcarnitine        | 0.001    | 0.001     | 0.002       | 0.000   | 0.000     | 0.000       |
| S-3-hydroxy-octanoylcarnitine        | 0.001    | 0.006     | 0.006       | 0.001   | 0.001     | 0.001       |
| branched-chain C8                    | 0.000    | 0.000     | 0.000       | 0.000   | 0.000     | 0.000       |
| cis-3,4-methylene-heptanoylcarnitine | 0.000    | 0.000     | 0.000       | 0.000   | 0.000     | 0.000       |
| 4-methyl-octanoylcarnitine           | 0.001    | 0.002     | 0.001       | 0.000   | 0.001     | 0.000       |
| 2,6-dimethyl-heptanoylcarnitine      | 0.000    | 0.000     | 0.000       | 0.000   | 0.000     | 0.000       |
| decanoylcarnitine                    | 0.039    | 0.306     | 0.254       | 0.013   | 0.027     | 0.024       |
| cis-4-decenoylcarnitine              | 0.013    | 0.010     | 0.009       | 0.005   | 0.003     | 0.000       |
| cis-3,4-methylene-nonanoylcarnitine  | 0.002    | 0.000     | 0.001       | 0.001   | 0.000     | 0.000       |
| R-3-hydroxy-decanoylcarnitine        | 0.001    | 0.000     | 0.001       | 0.001   | 0.000     | 0.001       |
| S-3-hydroxy-decanoylcarnitine        | 0.005    | 0.020     | 0.016       | 0.002   | 0.001     | 0.004       |
