# Supplementary material
Source: PubMed Central journal article supplement (PMC4285541)
Supplement: supp_fj.14-255901_Supplemental_Table2.pdf [file supp_fj.14-255901_Supplemental_Table2.pdf]

|                                       |        |        |        |       |        |       |
|---------------------------------------|--------|--------|--------|-------|--------|-------|
| 5-decynoylcarnitine                   | 0.000  | 0.000  | 0.000  | 0.000 | 0.000  | 0.000 |
| lauroylcarnitine                      | 0.002  | 0.151  | 0.142  | 0.002 | 0.040  | 0.057 |
| trans-2-dodecenoylcarnitine           | 0.001  | 0.008  | 0.008  | 0.001 | 0.003  | 0.000 |
| R-3-hydroxy-lauroylcarnitine          | 0.001  | 0.001  | 0.002  | 0.000 | 0.000  | 0.000 |
| S-3-hydroxy-lauroylcarnitine          | 0.002  | 0.014  | 0.011  | 0.002 | 0.006  | 0.007 |
| myristoylcarnitine                    | 0.000  | 0.113  | 0.109  | 0.000 | 0.019  | 0.038 |
| myristoleoylcarnitine                 | 0.011  | 0.022  | 0.031  | 0.004 | 0.012  | 0.007 |
| cis-5-tetradecenoylcarnitine          | 0.000  | 0.000  | 0.000  | 0.000 | 0.000  | 0.000 |
| trans-2-tetradecenoylcarnitine        | 0.000  | 0.002  | 0.000  | 0.000 | 0.001  | 0.000 |
| cis,cis-5,8-tetradecadienoylcarnitine | 0.013  | 0.005  | 0.003  | 0.004 | 0.002  | 0.001 |
| R-3-hydroxy-myristoylcarnitine        | 0.000  | 0.000  | 0.000  | 0.000 | 0.000  | 0.000 |
| S-3-hydroxy-myristoylcarnitine        | 0.000  | 0.019  | 0.018  | 0.000 | 0.011  | 0.009 |
| hydroxy-C14:1                         | 0.000  | 0.001  | 0.001  | 0.000 | 0.000  | 0.000 |
| palmitoylcarnitine                    | 0.008  | 0.599  | 0.642  | 0.002 | 0.113  | 0.100 |
| palmitoleoylcarnitine                 | 0.000  | 0.008  | 0.016  | 0.000 | 0.008  | 0.008 |
| trans-2-hexadecenoylcarnitine         | 0.001  | 0.007  | 0.009  | 0.001 | 0.001  | 0.006 |
| R-3-hydroxy-palmitoylcarnitine        | 0.000  | 0.001  | 0.002  | 0.000 | 0.001  | 0.001 |
| S-3-hydroxy-palmitoylcarnitine        | 0.001  | 0.025  | 0.028  | 0.001 | 0.010  | 0.008 |
| hydroxy-C16:1                         | 0.010  | 0.009  | 0.007  | 0.002 | 0.002  | 0.001 |
| stearoylcarnitine                     | 0.000  | 0.000  | 0.000  | 0.000 | 0.000  | 0.000 |
| oleoylcarnitine                       | 0.000  | 0.000  | 0.000  | 0.000 | 0.000  | 0.000 |
| linoleoylcarnitine                    | 0.003  | 0.000  | 0.001  | 0.003 | 0.000  | 0.001 |
| alpha-linolenoylcarnitine             | 0.010  | 0.006  | 0.008  | 0.005 | 0.002  | 0.001 |
| gamma-linolenoylcarnitine             | 0.003  | 0.002  | 0.002  | 0.001 | 0.001  | 0.002 |
| R-3-hydroxy-stearoylcarnitine         | 0.001  | 0.000  | 0.001  | 0.001 | 0.000  | 0.000 |
| S-3-hydroxy-stearoylcarnitine         | 0.001  | 0.001  | 0.001  | 0.000 | 0.000  | 0.001 |
| hydroxy-C18:1                         | 0.004  | 0.011  | 0.004  | 0.004 | 0.001  | 0.002 |
| hydroxy-C18:2                         | 0.007  | 0.000  | 0.007  | 0.005 | 0.000  | 0.006 |
| hydroxy-C18:3                         | 0.004  | 0.006  | 0.003  | 0.001 | 0.004  | 0.002 |
| malonylcarnitine                      | 0.008  | 0.003  | 0.006  | 0.005 | 0.002  | 0.006 |
| succinylcarnitine                     | 0.019  | 0.014  | 0.018  | 0.002 | 0.004  | 0.004 |
| methyl-malonylcarnitine               | 0.012  | 0.012  | 0.013  | 0.002 | 0.001  | 0.002 |
| ethyl-malonylcarnitine                | 0.026  | 0.130  | 0.009  | 0.018 | 0.121  | 0.002 |
| glutaroylcarnitine                    | 0.048  | 0.036  | 0.031  | 0.020 | 0.008  | 0.024 |
| adipoylcarnitine                      | 0.008  | 0.006  | 0.007  | 0.003 | 0.001  | 0.001 |
| 3-methyl-glutaroylcarnitine           | 0.018  | 0.017  | 0.016  | 0.003 | 0.002  | 0.003 |
| suberoylcarnitine                     | 0.013  | 0.012  | 0.004  | 0.004 | 0.005  | 0.002 |
| sebacoylcarnitine                     | 0.010  | 0.013  | 0.014  | 0.002 | 0.008  | 0.004 |
| sum_of_individual_acylcarnitines      | 28.742 | 38.138 | 27.700 | 9.463 | 12.285 | 7.854 |
