# Supplementary material
Source: PubMed Central journal article supplement (PMC4285541)
Supplement: supp_fj.14-255901_Supplemental_Table3.pdf [file supp_fj.14-255901_Supplemental_Table3.pdf]

**Supplemental Table 2. Carnitine and acylcarnitine levels (nmol/25 cm<sup>2</sup> flask) in cell lysates**

|                                      | mean   |           |                  | sem   |           |                  |
|--------------------------------------|--------|-----------|------------------|-------|-----------|------------------|
|                                      | basal  | palmitate | palmitate +<br>e | basal | palmitate | palmitate +<br>e |
| total_carnitine                      | 16.933 | 17.393    | 14.926           | 2.801 | 3.854     | 1.553            |
| free_carnitine                       | 14.149 | 14.666    | 12.440           | 2.332 | 3.407     | 0.966            |
| butyrobetaine                        | 0.018  | 0.016     | 0.015            | 0.004 | 0.003     | 0.002            |
| acetylcarnitine                      | 1.468  | 1.430     | 1.233            | 0.327 | 0.253     | 0.262            |
| propionylcarnitine                   | 0.683  | 0.411     | 0.387            | 0.159 | 0.081     | 0.077            |
| butyrylcarnitine                     | 0.031  | 0.275     | 0.249            | 0.013 | 0.124     | 0.113            |
| isobutyrylcarnitine                  | 0.077  | 0.049     | 0.044            | 0.030 | 0.018     | 0.018            |
| R-3-hydroxy-butyrylcarnitine         | 0.003  | 0.006     | 0.005            | 0.001 | 0.002     | 0.002            |
| S-3-hydroxy-butyrylcarnitine         | 0.006  | 0.021     | 0.019            | 0.002 | 0.004     | 0.004            |
| valerylcarnitine                     | 0.001  | 0.001     | 0.001            | 0.000 | 0.000     | 0.000            |
| isovalerylcarnitine                  | 0.035  | 0.026     | 0.024            | 0.007 | 0.005     | 0.005            |
| 3-hydroxy-isovalerylcarnitine        | 0.029  | 0.013     | 0.011            | 0.002 | 0.003     | 0.002            |
| 2-methyl-butyrylcarnitine            | 0.359  | 0.233     | 0.216            | 0.058 | 0.037     | 0.036            |
| tigloylcarnitine                     | 0.006  | 0.004     | 0.003            | 0.001 | 0.001     | 0.001            |
| 3-methyl-crotonylcarnitine           | 0.001  | 0.000     | 0.000            | 0.000 | 0.000     | 0.000            |
| hexanoylcarnitine                    | 0.001  | 0.020     | 0.016            | 0.000 | 0.006     | 0.005            |
| R-3-hydroxy-hexanoylcarnitine        | 0.000  | 0.000     | 0.000            | 0.000 | 0.000     | 0.000            |
| S-3-hydroxy-hexanoylcarnitine        | 0.000  | 0.001     | 0.001            | 0.000 | 0.000     | 0.000            |
| phenylacetylcarnitine                | 0.000  | 0.000     | 0.000            | 0.000 | 0.000     | 0.000            |
| phenylpropionylcarnitine             | 0.000  | 0.000     | 0.000            | 0.000 | 0.000     | 0.000            |
| 4-phenyl-butyrylcarnitine            | 0.000  | 0.000     | 0.000            | 0.000 | 0.000     | 0.000            |
| benzoylcarnitine                     | 0.000  | 0.000     | 0.000            | 0.000 | 0.000     | 0.000            |
| 4-methyl-hexanoylcarnitine           | 0.000  | 0.000     | 0.000            | 0.000 | 0.000     | 0.000            |
| octanoylcarnitine                    | 0.000  | 0.004     | 0.003            | 0.000 | 0.001     | 0.001            |
| R-3-hydroxy-octanoylcarnitine        | 0.000  | 0.000     | 0.000            | 0.000 | 0.000     | 0.000            |
| S-3-hydroxy-octanoylcarnitine        | 0.000  | 0.002     | 0.002            | 0.000 | 0.000     | 0.000            |
| branched-chain C8                    | 0.000  | 0.000     | 0.000            | 0.000 | 0.000     | 0.000            |
| cis-3,4-methylene-heptanoylcarnitine | 0.000  | 0.000     | 0.000            | 0.000 | 0.000     | 0.000            |
| 4-methyl-octanoylcarnitine           | 0.000  | 0.000     | 0.000            | 0.000 | 0.000     | 0.000            |
| 2,6-dimethyl-heptanoylcarnitine      | 0.000  | 0.000     | 0.000            | 0.000 | 0.000     | 0.000            |
| decanoylcarnitine                    | 0.000  | 0.005     | 0.004            | 0.000 | 0.001     | 0.001            |
| cis-4-decenoylcarnitine              | 0.000  | 0.000     | 0.000            | 0.000 | 0.000     | 0.000            |
| cis-3,4-methylene-nonanoylcarnitine  | 0.000  | 0.000     | 0.000            | 0.000 | 0.000     | 0.000            |
| R-3-hydroxy-decanoylcarnitine        | 0.000  | 0.000     | 0.000            | 0.000 | 0.000     | 0.000            |
| S-3-hydroxy-decanoylcarnitine        | 0.000  | 0.001     | 0.001            | 0.000 | 0.000     | 0.000            |
| 5-decynoylcarnitine                  | 0.000  | 0.000     | 0.000            | 0.000 | 0.000     | 0.000            |
| lauroylcarnitine                     | 0.000  | 0.007     | 0.006            | 0.000 | 0.001     | 0.001            |
